# Supplementary material for: DNA Damage and Radiosensitivity in Blood Cells from Subjects Undergoing 45 Days of Isolation and Confinement: An Explorative Study
Source: MDPI journal article supplement (doi:10.3390/cimb44020046), 2022-01-27
Supplement: s1 [file s1]

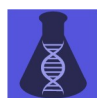

**Table S1.** Percent reduction in median DNAI after irradiation relative to reduction at baseline, along with 95% confidence intervals and adjusted p values. # denotes adj p < 0.1.

| Mission | Mission day   | % Reduction DNAI | 95% conf      |               | Adjusted p-value  |
|---------|---------------|------------------|---------------|---------------|-------------------|
| 3       | Day 3         | 9.344            | -2.206        | 19.589        | 1.00E+00          |
| 3       | Day 10        | 16.439           | 4.764         | 26.683        | 1.39E-01          |
| 3       | Day 17        | 7.907            | 0.155         | 15.057        | 6.40E-01          |
| 3       | Day 24        | 3.638            | -5.137        | 11.680        | 1.00E+00          |
| 3       | Day 31        | 12.029           | 2.174         | 20.890        | 3.20E-01          |
| 3       | Day 38        | 6.374            | -4.278        | 15.937        | 1.00E+00          |
| 3       | <b>Day 45</b> | <b>14.545</b>    | <b>6.151</b>  | <b>22.188</b> | <b>2.82E-02 #</b> |
| 3       | R+1           | 10.157           | 2.303         | 17.379        | 2.25E-01          |
| 3       | <b>R+7</b>    | <b>17.605</b>    | <b>10.199</b> | <b>24.401</b> | <b>4.35E-04 #</b> |
| 5       | Day 3         | 1.226            | -6.120        | 8.065         | 1.00E+00          |
| 5       | <b>Day 10</b> | <b>19.959</b>    | <b>14.769</b> | <b>24.833</b> | <b>4.44E-10 #</b> |
| 5       | <b>Day 17</b> | <b>18.991</b>    | <b>13.834</b> | <b>23.838</b> | <b>1.88E-09 #</b> |
| 5       | <b>Day 24</b> | <b>22.882</b>    | <b>13.703</b> | <b>31.084</b> | <b>2.68E-04 #</b> |
| 5       | <b>Day 31</b> | <b>17.856</b>    | <b>11.136</b> | <b>24.067</b> | <b>5.05E-05 #</b> |
| 5       | Day 38        | 0.869            | -4.792        | 6.225         | 1.00E+00          |
| 5       | Day 45        | 2.642            | -6.567        | 11.056        | 1.00E+00          |
| 5       | R+1           | 6.131            | -2.321        | 13.884        | 1.00E+00          |
| 5       | R+7           | 4.132            | -5.627        | 12.989        | 1.00E+00          |

**Table S2.** Change in mean ADRR (DNAI/hr), 95% confidence intervals, and adjusted p-values. # denotes adj p < 0.1.

| Mission | Mission day   | $\Delta$ ADRR | 95% conf      |               | Adjusted p-value    |
|---------|---------------|---------------|---------------|---------------|---------------------|
| 1       | Day 3         | -0.026        | -0.104        | 0.053         | 1.0000E+00          |
| 1       | Day 10        | 0.033         | -0.049        | 0.115         | 1.0000E+00          |
| 1       | Day 17        | 0.017         | -0.036        | 0.070         | 1.0000E+00          |
| 1       | Day 24        | 0.071         | 0.009         | 0.133         | 3.8145E-01          |
| 1       | Day 38        | 0.057         | 0.008         | 0.107         | 3.8145E-01          |
| 1       | <b>Day 45</b> | <b>0.088</b>  | <b>0.038</b>  | <b>0.137</b>  | <b>1.6092E-02 #</b> |
| 1       | R+1           | 0.043         | -0.011        | 0.098         | 1.0000E+00          |
| 1       | R+7           | 0.034         | -0.016        | 0.084         | 1.0000E+00          |
| 2       | Day 3         | 0.020         | -0.029        | 0.068         | 1.0000E+00          |
| 2       | Day 10        | 0.050         | 0.014         | 0.086         | 1.3926E-01          |
| 2       | <b>Day 17</b> | <b>0.056</b>  | <b>0.020</b>  | <b>0.091</b>  | <b>5.4293E-02 #</b> |
| 3       | Day 3         | -0.067        | -0.188        | 0.055         | 1.0000E+00          |
| 3       | Day 10        | -0.106        | -0.196        | -0.017        | 3.3523E-01          |
| 3       | Day 17        | -0.017        | -0.118        | 0.084         | 1.0000E+00          |
| 3       | <b>Day 24</b> | <b>-0.173</b> | <b>-0.246</b> | <b>-0.100</b> | <b>1.5742E-04 #</b> |
| 3       | Day 31        | -0.030        | -0.134        | 0.073         | 1.0000E+00          |
| 3       | Day 38        | -0.048        | -0.116        | 0.020         | 1.0000E+00          |
| 3       | Day 45        | -0.066        | -0.165        | 0.033         | 1.0000E+00          |
| 3       | <b>R+1</b>    | <b>-0.152</b> | <b>-0.212</b> | <b>-0.093</b> | <b>2.9080E-05 #</b> |
| 3       | R+7           | 0.012         | -0.080        | 0.103         | 1.0000E+00          |
| 4       | <b>Day 3</b>  | <b>-0.038</b> | <b>-0.061</b> | <b>-0.015</b> | <b>3.0595E-02 #</b> |
| 4       | Day 10        | 0.001         | -0.037        | 0.038         | 1.0000E+00          |
| 4       | Day 17        | -0.019        | -0.048        | 0.010         | 1.0000E+00          |
| 4       | Day 24        | -0.036        | -0.073        | 0.000         | 6.8533E-01          |
| 4       | <b>Day 31</b> | <b>-0.035</b> | <b>-0.057</b> | <b>-0.014</b> | <b>3.1416E-02 #</b> |
| 4       | <b>Day 38</b> | <b>-0.083</b> | <b>-0.109</b> | <b>-0.058</b> | <b>1.2030E-08 #</b> |
| 4       | <b>Day 45</b> | <b>-0.085</b> | <b>-0.142</b> | <b>-0.028</b> | <b>7.2355E-02</b>   |
| 4       | R+7           | -0.033        | -0.066        | 0.000         | 6.9458E-01          |
| 5       | <b>Day 3</b>  | <b>0.049</b>  | <b>0.018</b>  | <b>0.080</b>  | <b>4.3669E-02 #</b> |
| 5       | <b>Day 10</b> | <b>0.106</b>  | <b>0.079</b>  | <b>0.134</b>  | <b>8.8390E-12 #</b> |
| 5       | <b>Day 17</b> | <b>0.209</b>  | <b>0.171</b>  | <b>0.247</b>  | <b>2.8000E-24 #</b> |
| 5       | <b>Day 24</b> | <b>0.099</b>  | <b>0.049</b>  | <b>0.148</b>  | <b>3.5439E-03 #</b> |
| 5       | <b>Day 31</b> | <b>0.086</b>  | <b>0.031</b>  | <b>0.141</b>  | <b>5.0631E-02 #</b> |
| 5       | <b>Day 38</b> | <b>0.083</b>  | <b>0.034</b>  | <b>0.131</b>  | <b>2.3134E-02 #</b> |
| 5       | <b>Day 45</b> | <b>0.162</b>  | <b>0.115</b>  | <b>0.209</b>  | <b>1.2100E-09 #</b> |
| 5       | <b>R+1</b>    | <b>0.197</b>  | <b>0.161</b>  | <b>0.233</b>  | <b>3.0690E-24 #</b> |
| 5       | R+7           | 0.022         | -0.002        | 0.045         | 8.8174E-01          |

**Table S3.** Allocation of samples to 7 experimental conditions for a given subject and mission time point as originally planned.

| Exp Condition | Radiation       | Incubation Time (min) | Replicates |
|---------------|-----------------|-----------------------|------------|
| 1             | pre-irradiation | none                  | 4          |
| 2             | 3.73 Gy         | 0                     | 4          |
| 3             | 3.73 Gy         | 10                    | 4          |
| 4             | 3.73 Gy         | 20                    | 4          |
| 5             | 3.73 Gy         | 30                    | 4          |
| 6             | 3.73 Gy         | 40                    | 4          |
| 7             | 3.73 Gy         | 50                    | 4          |
|               |                 |                       | Total = 28 |
